# Supplementary material
Source: PubMed Central journal article supplement (PMC7402610)
Supplement: pcc-21-e538-s001.pdf [file pcc-21-e538-s001.pdf]

**Supplemental Digital Content 1: COVID-19 hashtags used before and after March 14<sup>th</sup>, 2020**

| <b>Hashtag</b>       | <b>Times Used*<br/>(2/1-3/13/20)</b> | <b>Hashtag</b>     | <b>Times Used*<br/>(3/14-5/1/20)</b> |
|----------------------|--------------------------------------|--------------------|--------------------------------------|
| #COVID19             | 1,623                                | #COVID19           | 15,868                               |
| #coronavirus         | 214                                  | #SARSCoV2          | 3,655                                |
| #COVID— 19           | 119                                  | #coronavirus       | 1,064                                |
| #Coronavid19         | 109                                  | #COVID— 19         | 914                                  |
| #Covid_19            | 93                                   | #Covid_19          | 627                                  |
| #COVID2019           | 63                                   | #covid4MDs         | 317                                  |
| #2019nCoV            | 44                                   | #COVID2019         | 261                                  |
| #nCoV2019            | 31                                   | #COVID             | 261                                  |
| #COVID               | 28                                   | #COVIDfoam         | 154                                  |
| #COVID19mx           | 21                                   | #Coronavid19       | 110                                  |
| #NovelCoronavirus    | 14                                   | #COVIDLMIC         | 62                                   |
| #CoronavirusOutbreak | 13                                   | #COVID19ON         | 56                                   |
| #CoronaVirusUpdate   | 10                                   | #2019nCoV          | 44                                   |
| #LitCovid            | 9                                    | #COVID19pandemic   | 35                                   |
| #SARSCoV2            | 7                                    | #nCoV2019          | 31                                   |
| #CoronavirusPandemic | 6                                    | #coronavirusEspana | 30                                   |
| #Covid19usa          | 6                                    | #COVID19mx         | 27                                   |
| #CoronaOutbreak      | 5                                    | #covod19           | 27                                   |
| #covid_19italia      | 5                                    | #Covid19usa        | 25                                   |
| #COVD19              | 4                                    | #SARS_COV_2        | 24                                   |
| #COVID19Aus          | 4                                    | #sarscovid2        | 24                                   |
| #COVID19US           | 4                                    | #COVID— mx         | 23                                   |
| #Corona              | 3                                    | #Corona            | 20                                   |
| #COVID19FOAM         | 3                                    | #COVID__19         | 19                                   |
| #COVID2019mx         | 3                                    | #WIMCovid19        | 18                                   |

\*Hashtag use not mutually exclusive, totals include tweets where other COVID-19 hashtags may have been used

Supplemental Digital Content 2. Top 15 hashtags used with #PedsICU (2/1/20-5/1/20).

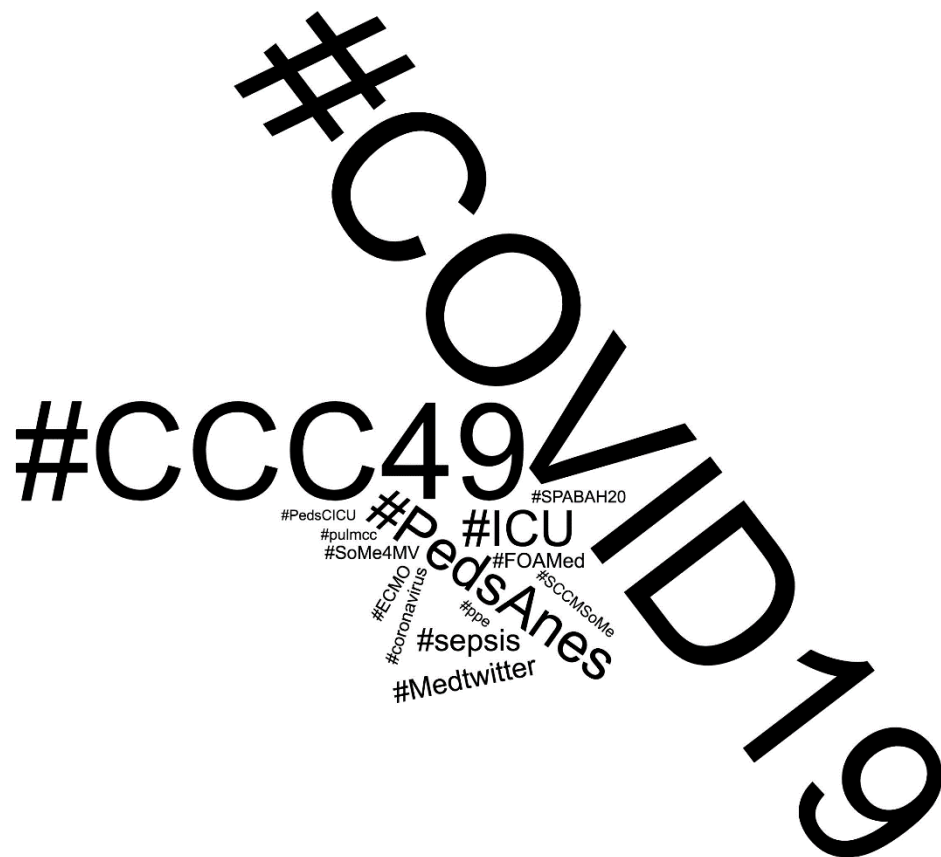

**Supplemental Digital Content 3: Most popular tweets containing #PedsICU and COVID-19 hashtag (2/1/20-5/1/20)**

| Impressions/<br>Views | Shares | Username      | Healthcare<br>Stakeholder | Tweet Text                                                                                                                                                                                                                                                                                                 | Date                           | URL                                                                                                                                   |
|-----------------------|--------|---------------|---------------------------|------------------------------------------------------------------------------------------------------------------------------------------------------------------------------------------------------------------------------------------------------------------------------------------------------------|--------------------------------|---------------------------------------------------------------------------------------------------------------------------------------|
| 6,973,804             | 3250   | @PICSociety   | Org.<br>Advocacy          | <p>*Urgent alert*</p> <p>Rising no of cases presenting to #PedsICU with multi-system hyperinflammatory state, overlapping features of toxic shock syndrome &amp; atypical Kawasaki disease, bloods consistent with severe #COVID19 - seen in both #SARSCoV2 PCR +ve AND -ve</p> <p>Please share widely</p> | Sun, Apr 26,<br>2020, 4:32 PM  | <a href="https://twitter.com/PICSociety/status/1254508725227982848">https://twitter.com/PICSociety/status/1254508725227982848</a>     |
| 682,045               | 438    | @apsmunro     | Doctor                    | <p>Ok a few things have been moving in the world of paediatric #COVID-19 literature</p> <p>Time for an updated #tweetorial on SARS-CoV-2 infection in children!</p> <p>#FOAMped #FOAMed #PedsICU #PedsID #IDtwitter</p> <p>1/12</p>                                                                        | Mon, Apr 20,<br>2020, 3:29 PM  | <a href="https://twitter.com/apsmunro/status/1252318574204596231">https://twitter.com/apsmunro/status/1252318574204596231</a>         |
| 1,340,604             | 415    | @ErinHerstine | Doctor                    | <p>I spent the afternoon with many @HopkinsMedicine colleagues making #ppe for the staff. I am sharing (with permission) the steps and materials for making face shields of your own. We are all in this together. #PPEshortage #ppeisnotoptional #PedsICU #covid19 #ICU #healthcare</p>                   | Sat, Mar 21,<br>2020, 1:42 AM  | <a href="https://twitter.com/ErinHerstine/status/1241238704624107521">https://twitter.com/ErinHerstine/status/1241238704624107521</a> |
| 304,011               | 404    | @apsmunro     | Doctor                    | <p>OK, time for a tweet summary of what we know from the paediatric literature about #COVID19 in kids SO FAR</p> <p>Given the disease has only existed for 3 months, it's quite a lot...</p>                                                                                                               | Tue, Mar 24,<br>2020, 12:35 PM | <a href="https://twitter.com/apsmunro/status/124249029537308901">https://twitter.com/apsmunro/status/124249029537308901</a>           |

|         |     |                  |               |                                                                                                                                                                                                                                                                                         |                             |                                                                                                                                             |
|---------|-----|------------------|---------------|-----------------------------------------------------------------------------------------------------------------------------------------------------------------------------------------------------------------------------------------------------------------------------------------|-----------------------------|---------------------------------------------------------------------------------------------------------------------------------------------|
|         |     |                  |               | #FOAMPed #PedsICU #IDTwitter<br>1/7                                                                                                                                                                                                                                                     |                             |                                                                                                                                             |
| 328,715 | 285 | @PedsIntensiva   | Org. Provider | 1/31 1st podcast & tweetorial for Pediatrica Intensiva, the art & science of pediatric intensive care.<br><br>Incredible real experience of battling 100s of #COVID19 cases with intensivists Giovanna Colombo & Lorenzo Grazioli from Bergamo, Italy<br><br>#ICU #pedsICU              | Sat, Mar 14, 2020, 6:10 AM  | <a href="https://twitter.com/PedsIntensiva/status/1238769442378711040">https://twitter.com/PedsIntensiva/status/1238769442378711040</a>     |
| 537,050 | 247 | @DrJulieDunbar   | Doctor        | Our children's hospital in NYC just admitted 30 sick #COVID19+ adult pts to the #PHM service. We are ready & willing but nervous. I want to #crowdsource some words of wisdom & encouragement for my team. What advice do you have? Pls RT.<br><br>@SocietyHospMed #PedsICU #medtwitter | Tue, Mar 31, 2020, 10:28 AM | <a href="https://twitter.com/DrJulieDunbar/status/1244995087144300545">https://twitter.com/DrJulieDunbar/status/1244995087144300545</a>     |
| 322,425 | 217 | @innov8doc       | Doctor        | How well do clear drapes prevent droplet spray/aerosolization during intubation and extubation of COVID positive/suspected patients? We carried out an experiment. Turns out they do VERY well! You've got to see the video #COVID19 #coronavirus #pedsanes #pedsicu #anesthesia        | Wed, Mar 18, 2020, 9:49 PM  | <a href="https://twitter.com/innov8doc/status/1240455223929458696">https://twitter.com/innov8doc/status/1240455223929458696</a>             |
| 434,639 | 177 | @miguelrdgzrubio | Doctor        | A self-updating PubMed search with all the relevant pediatric #COVID19 papers.<br><br><a href="https://t.co/oVYPg5outv">https://t.co/oVYPg5outv</a><br><br>Someone shared this on an international #PedsICU WhatsApp group and I thought you should know.                               | Sat, Mar 14, 2020, 1:06 PM  | <a href="https://twitter.com/miguelrdgzrubio/status/1238874184819843072">https://twitter.com/miguelrdgzrubio/status/1238874184819843072</a> |

|         |     |                 |                             |                                                                                                                                                                                                                                                                                                                                                   |                            |                                                                                                                                         |
|---------|-----|-----------------|-----------------------------|---------------------------------------------------------------------------------------------------------------------------------------------------------------------------------------------------------------------------------------------------------------------------------------------------------------------------------------------------|----------------------------|-----------------------------------------------------------------------------------------------------------------------------------------|
| 187,316 | 124 | @DeepaKattail   | Doctor, Researcher/Academic | This artwork has given me strength, to be brave...as a physician who will very soon be on the front lines to fight a battle that may consume me. Thank you @SaraPaglia84, I now know the artist behind this image.<br>#covid19 #FlattenTheCuve #pedsanes #medtwitter #PedsICU                                                                     | Fri, Mar 20, 2020, 8:10 PM | <a href="https://twitter.com/DeepaKattail/status/1241155228931633152">https://twitter.com/DeepaKattail/status/1241155228931633152</a>   |
| 246,088 | 121 | @PedCritCareMed | Org. Media                  | FREE download & #VisualAbstract!<br><br>The first #COVID19 #PedsICU publication from @PedCritCareMed is hot off the press now!<br><br><a href="https://t.co/hRcsfMtorL">https://t.co/hRcsfMtorL</a><br><br>by @ongsoomay @TexKissoon et al @srinmurthy99<br><br>@SCCM @WFPICCS @PALISnet @paccman_asia @LA_Rednetwork @PECCAfrica @ESPNIC_Society | Tue, Apr 7, 2020, 12:02 PM | <a href="https://twitter.com/PedCritCareMed/status/124755265869864962">https://twitter.com/PedCritCareMed/status/124755265869864962</a> |
